# Supplementary material
Source: PubMed Central journal article supplement (PMC8465775)

# Supp. Fig. 7

a.

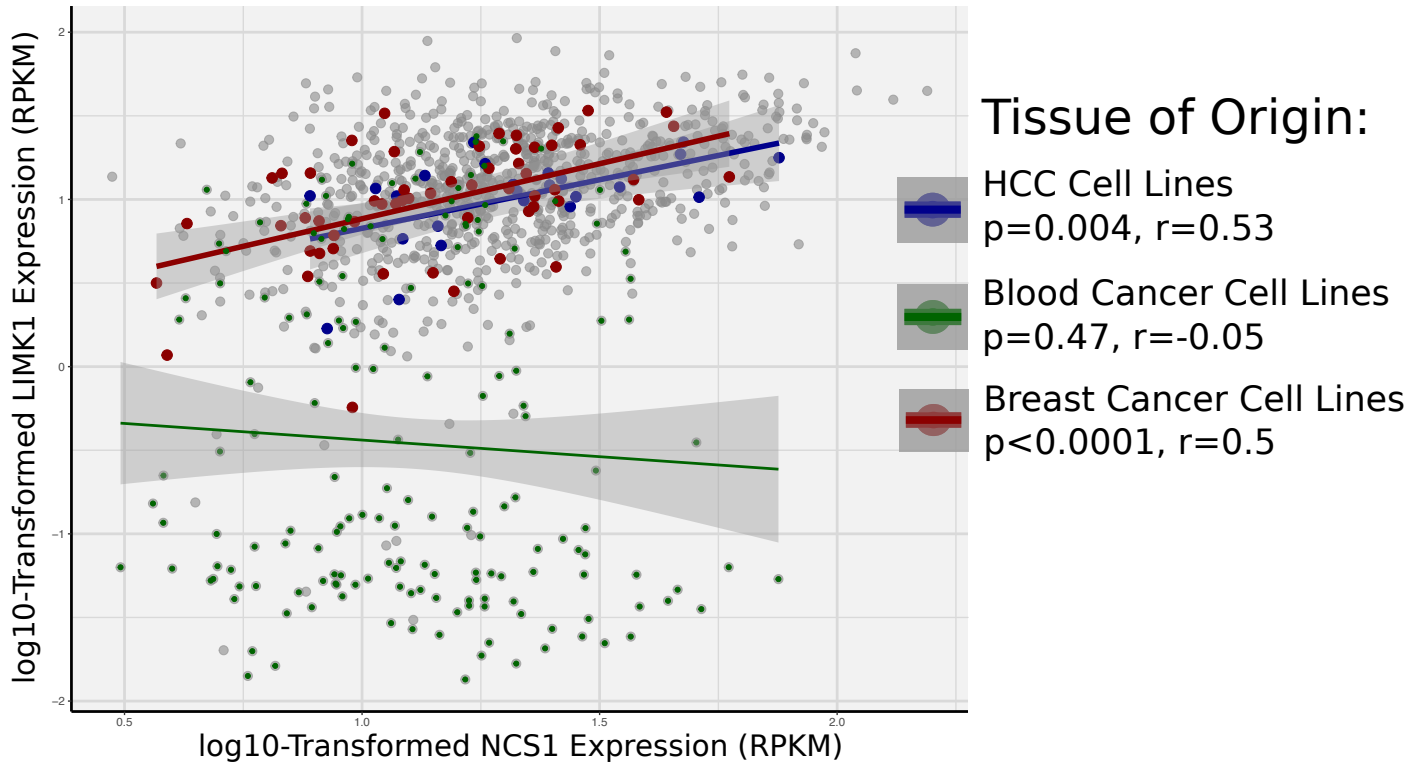

b.

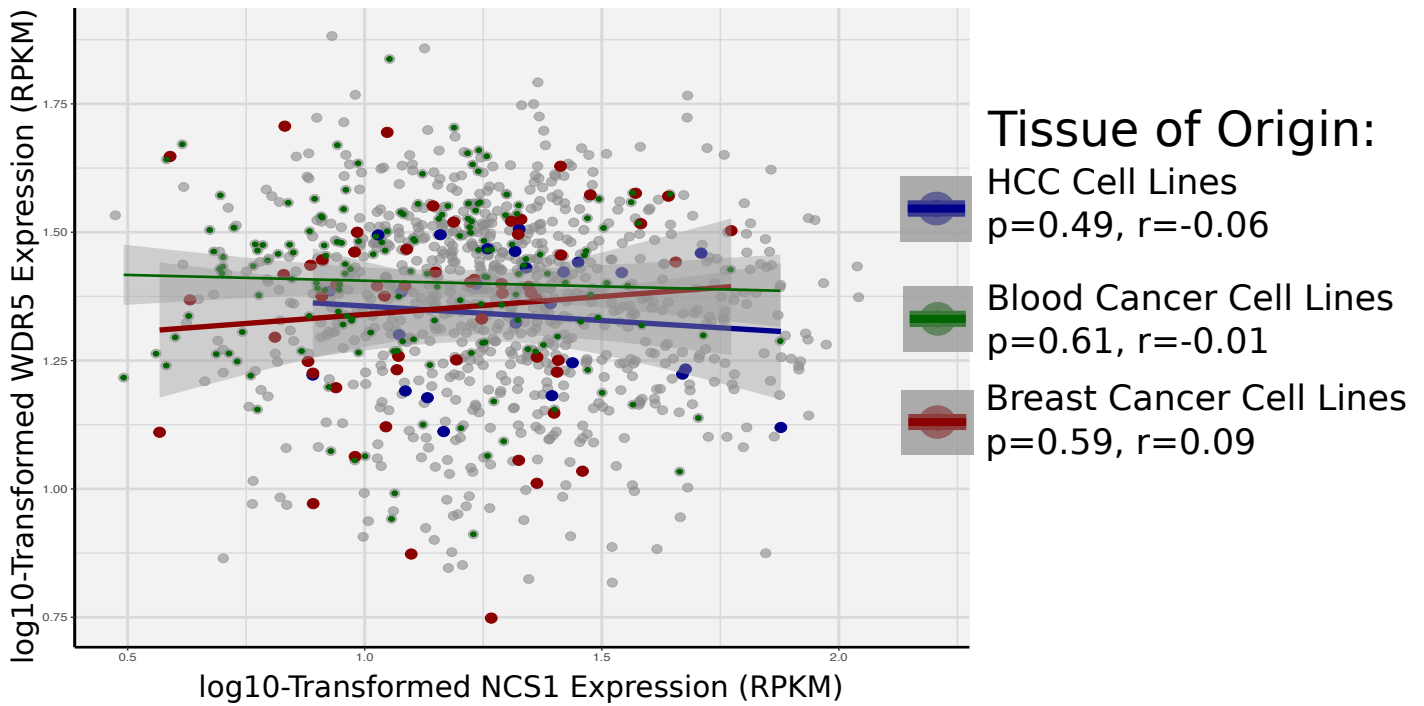

Supplement: NIHMS1580879-supplement-Supplementary_fig_7.pdf [file NIHMS1580879-supplement-Supplementary_fig_7.pdf]

# Supp. Fig. 1

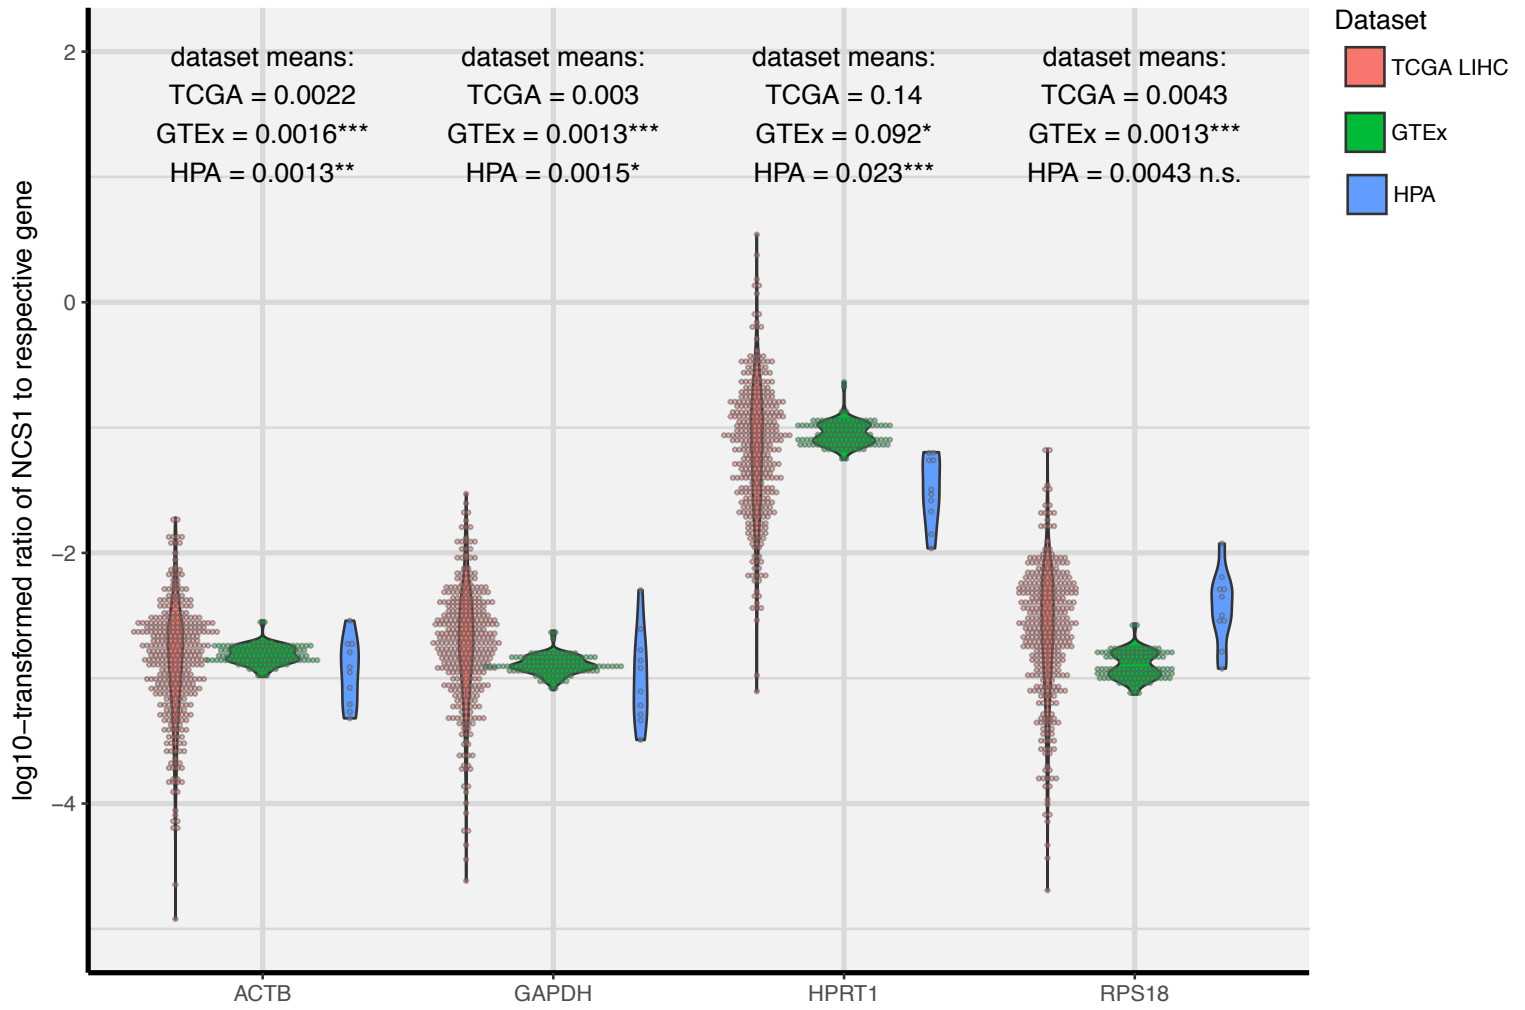

# Supp. Fig. 2

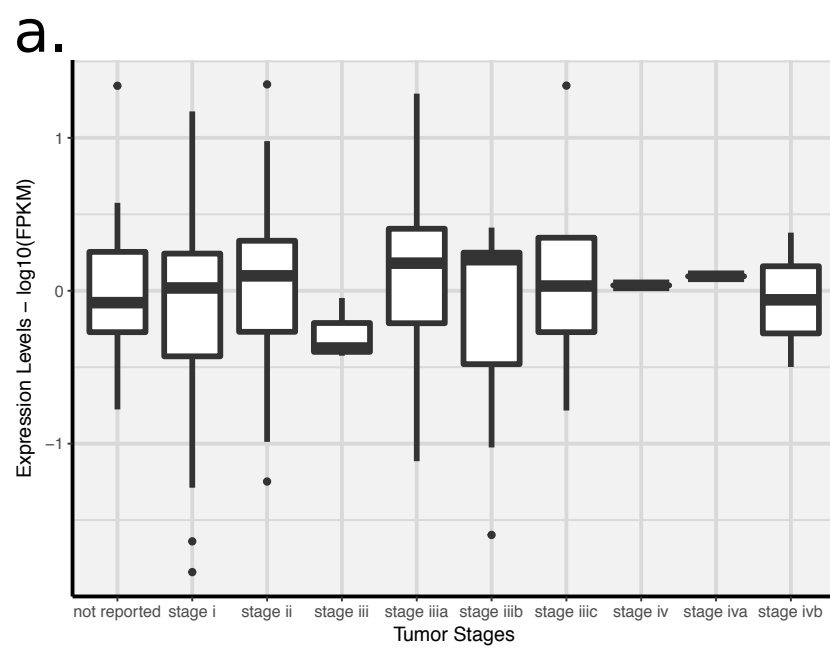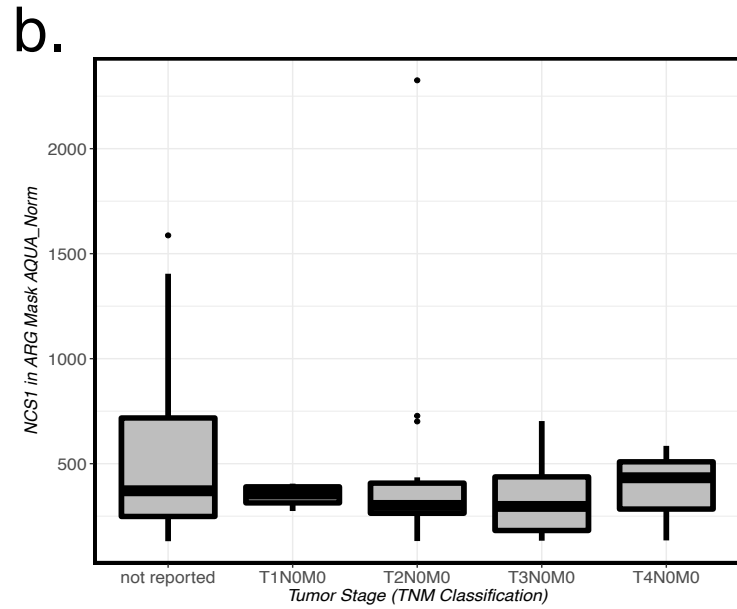

Supplement: NIHMS1580879-supplement-Supplementary_figs_1_2.pdf [file NIHMS1580879-supplement-Supplementary_figs_1_2.pdf]

# Supp. Fig. 3

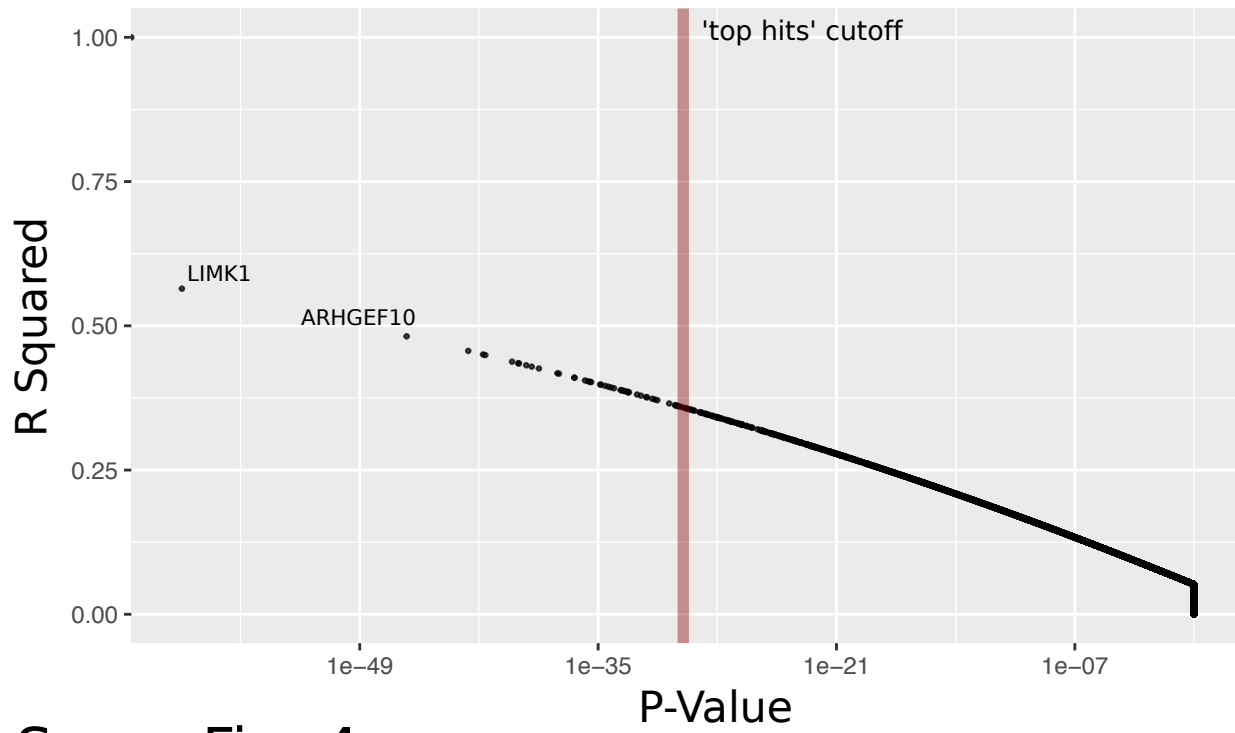

# Supp. Fig. 4

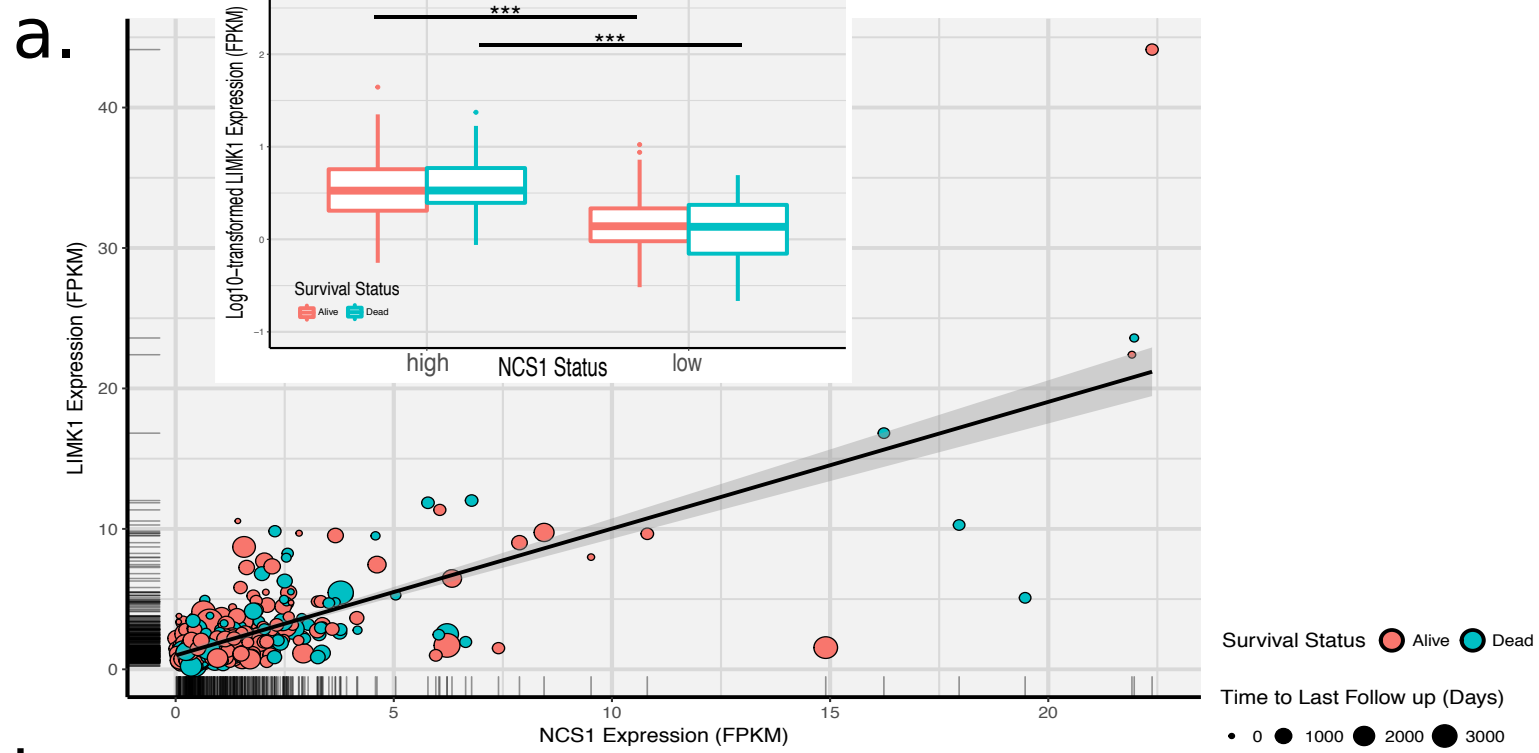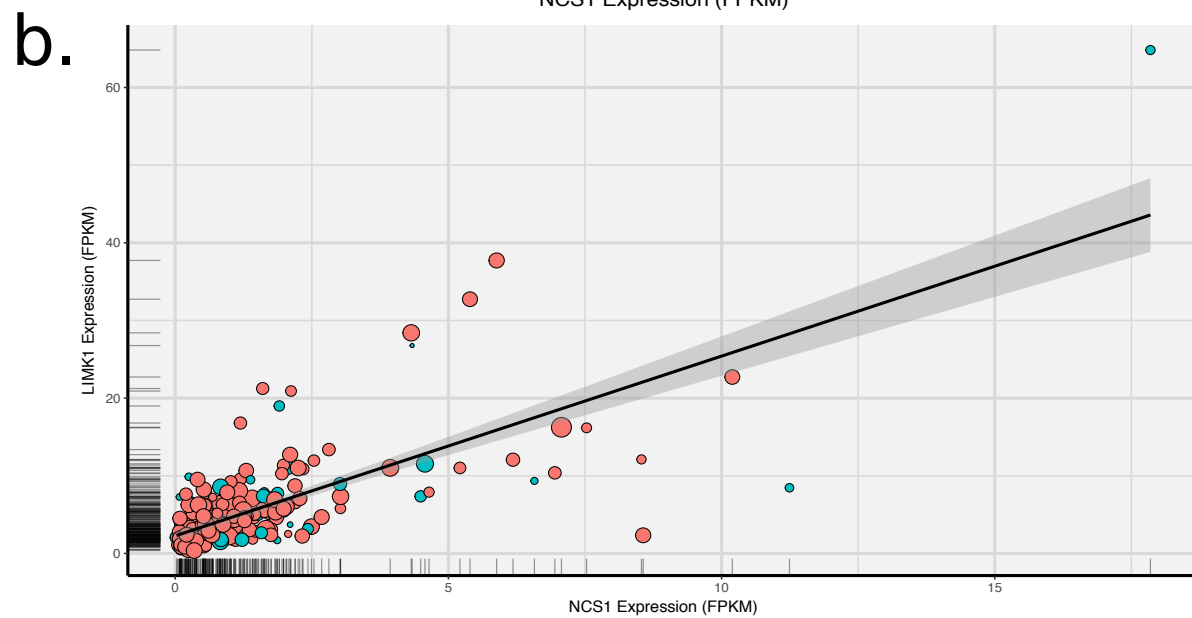

Supplement: NIHMS1580879-supplement-Supplementary_figs_3_4.pdf [file NIHMS1580879-supplement-Supplementary_figs_3_4.pdf]

# Supp. Fig. 5

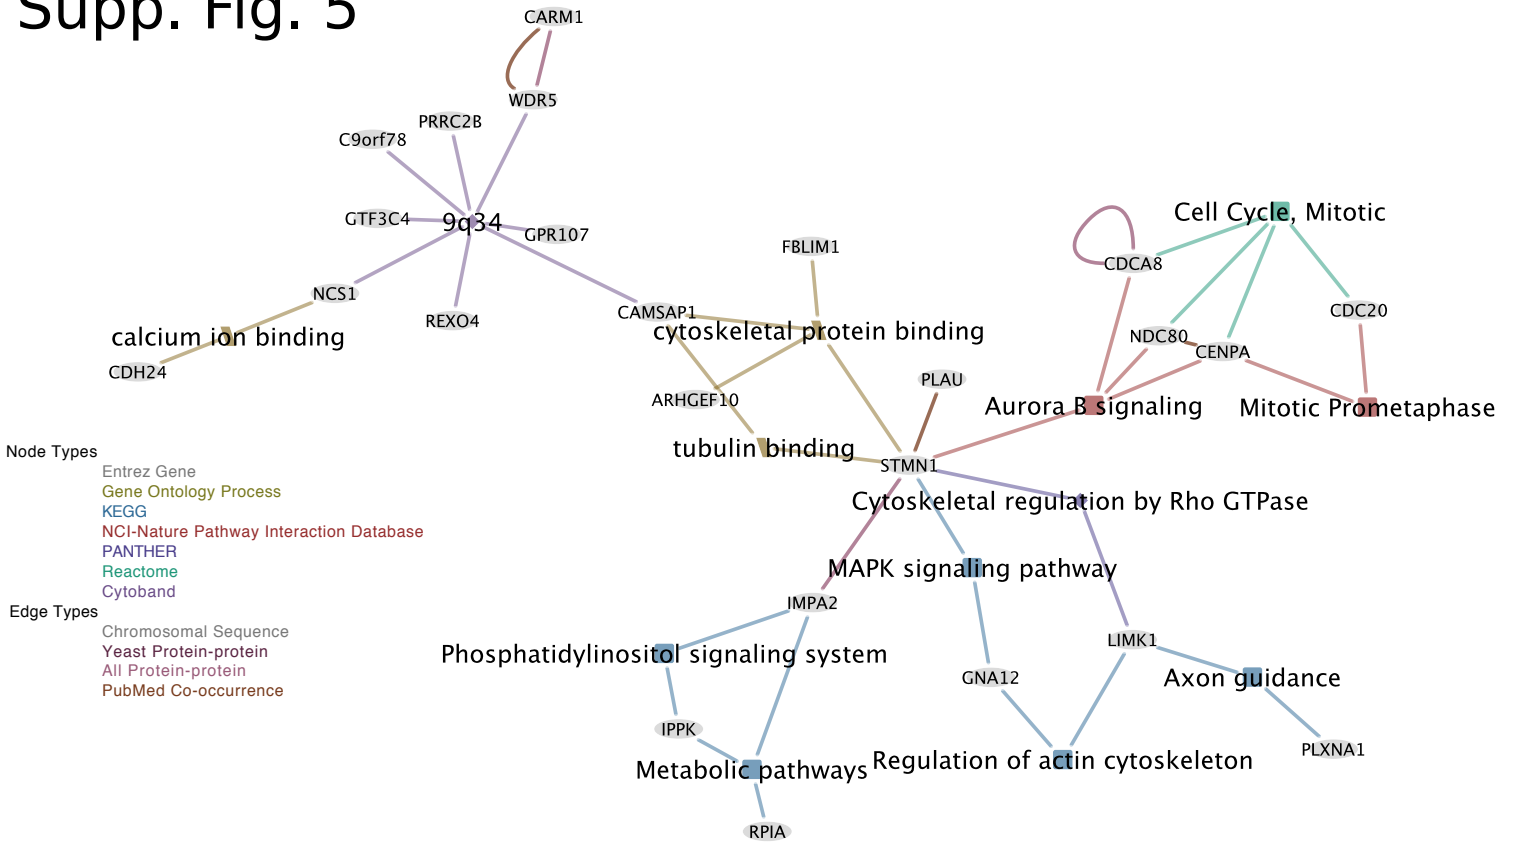

# Supp. Fig. 6

a.

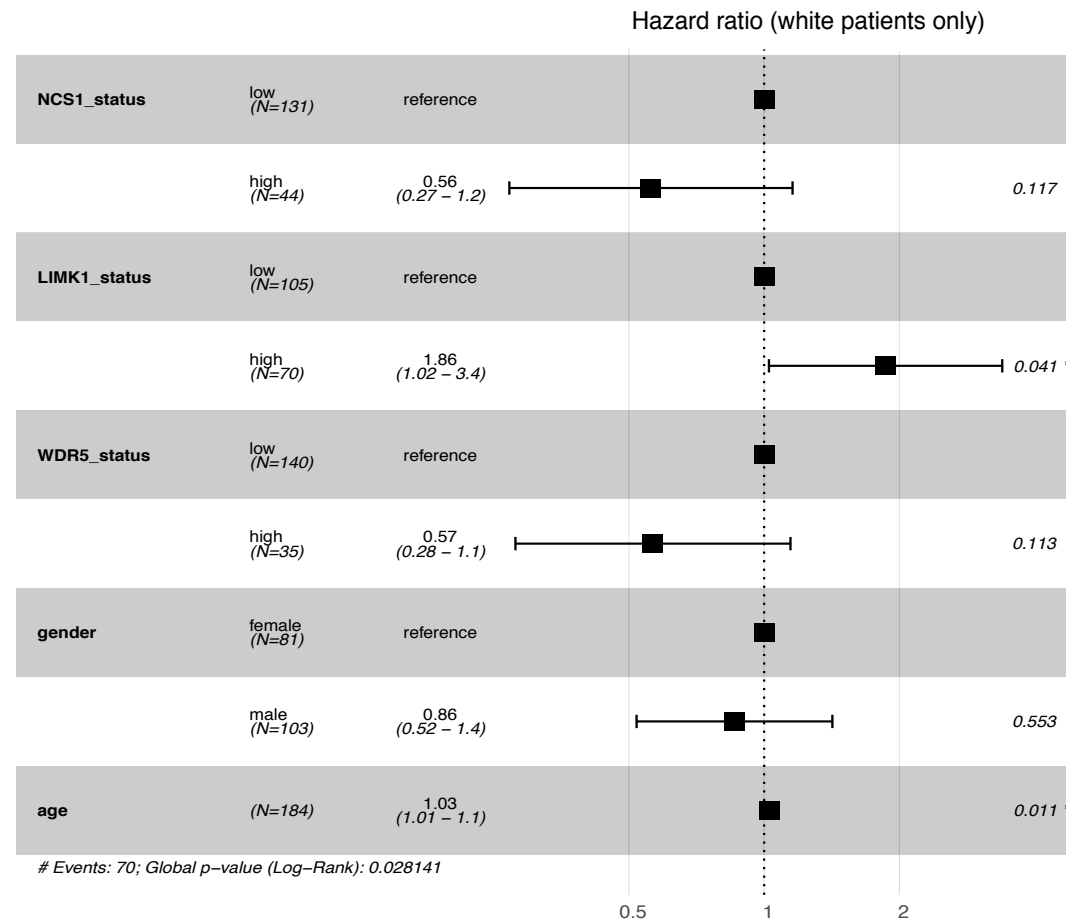

b.

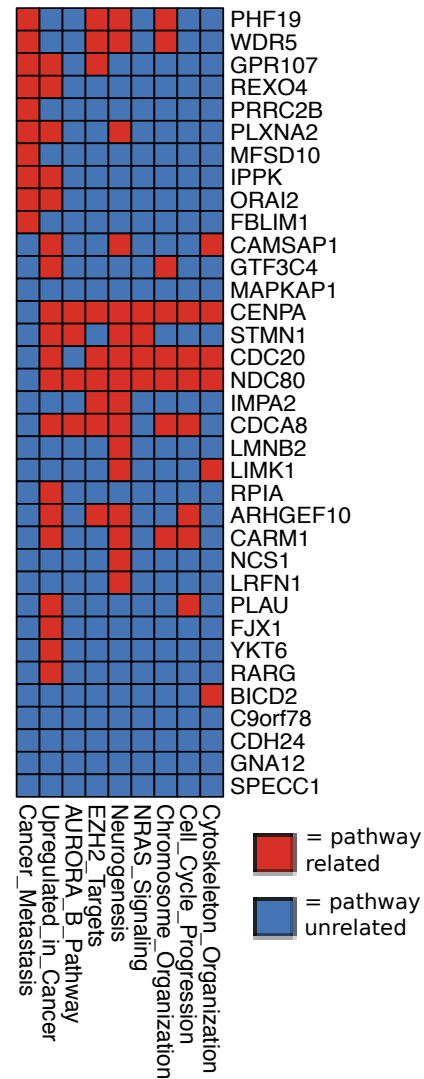

Supplement: NIHMS1580879-supplement-Supplementary_figs_5_6.pdf [file NIHMS1580879-supplement-Supplementary_figs_5_6.pdf]
